# Supplementary material
Source: ML conference proceedings conference paper supplement (https://openreview.net/forum?id=2EvMmC23sC)

Llama3.1-8B Instruct   SFT   Distilled SFT   CFT   CGD

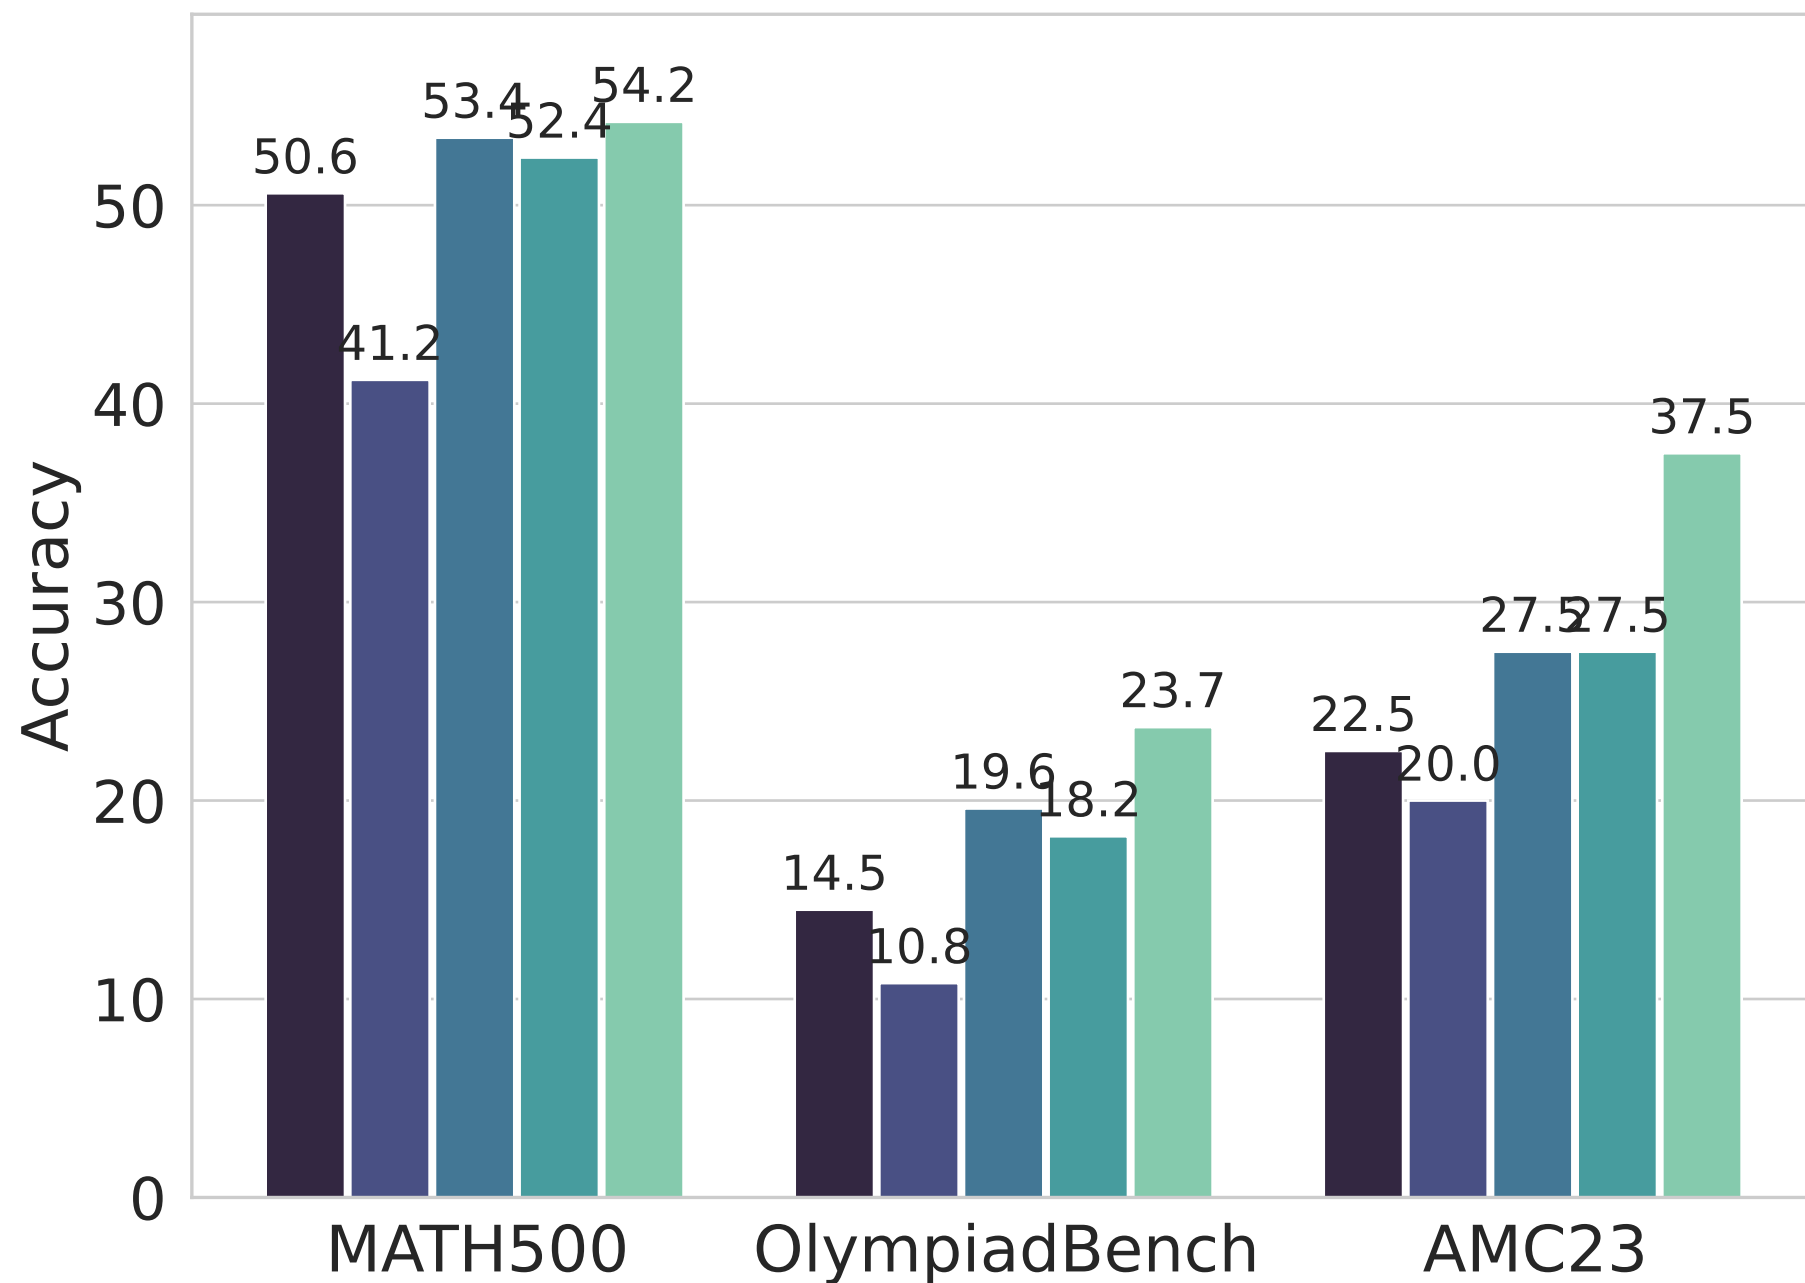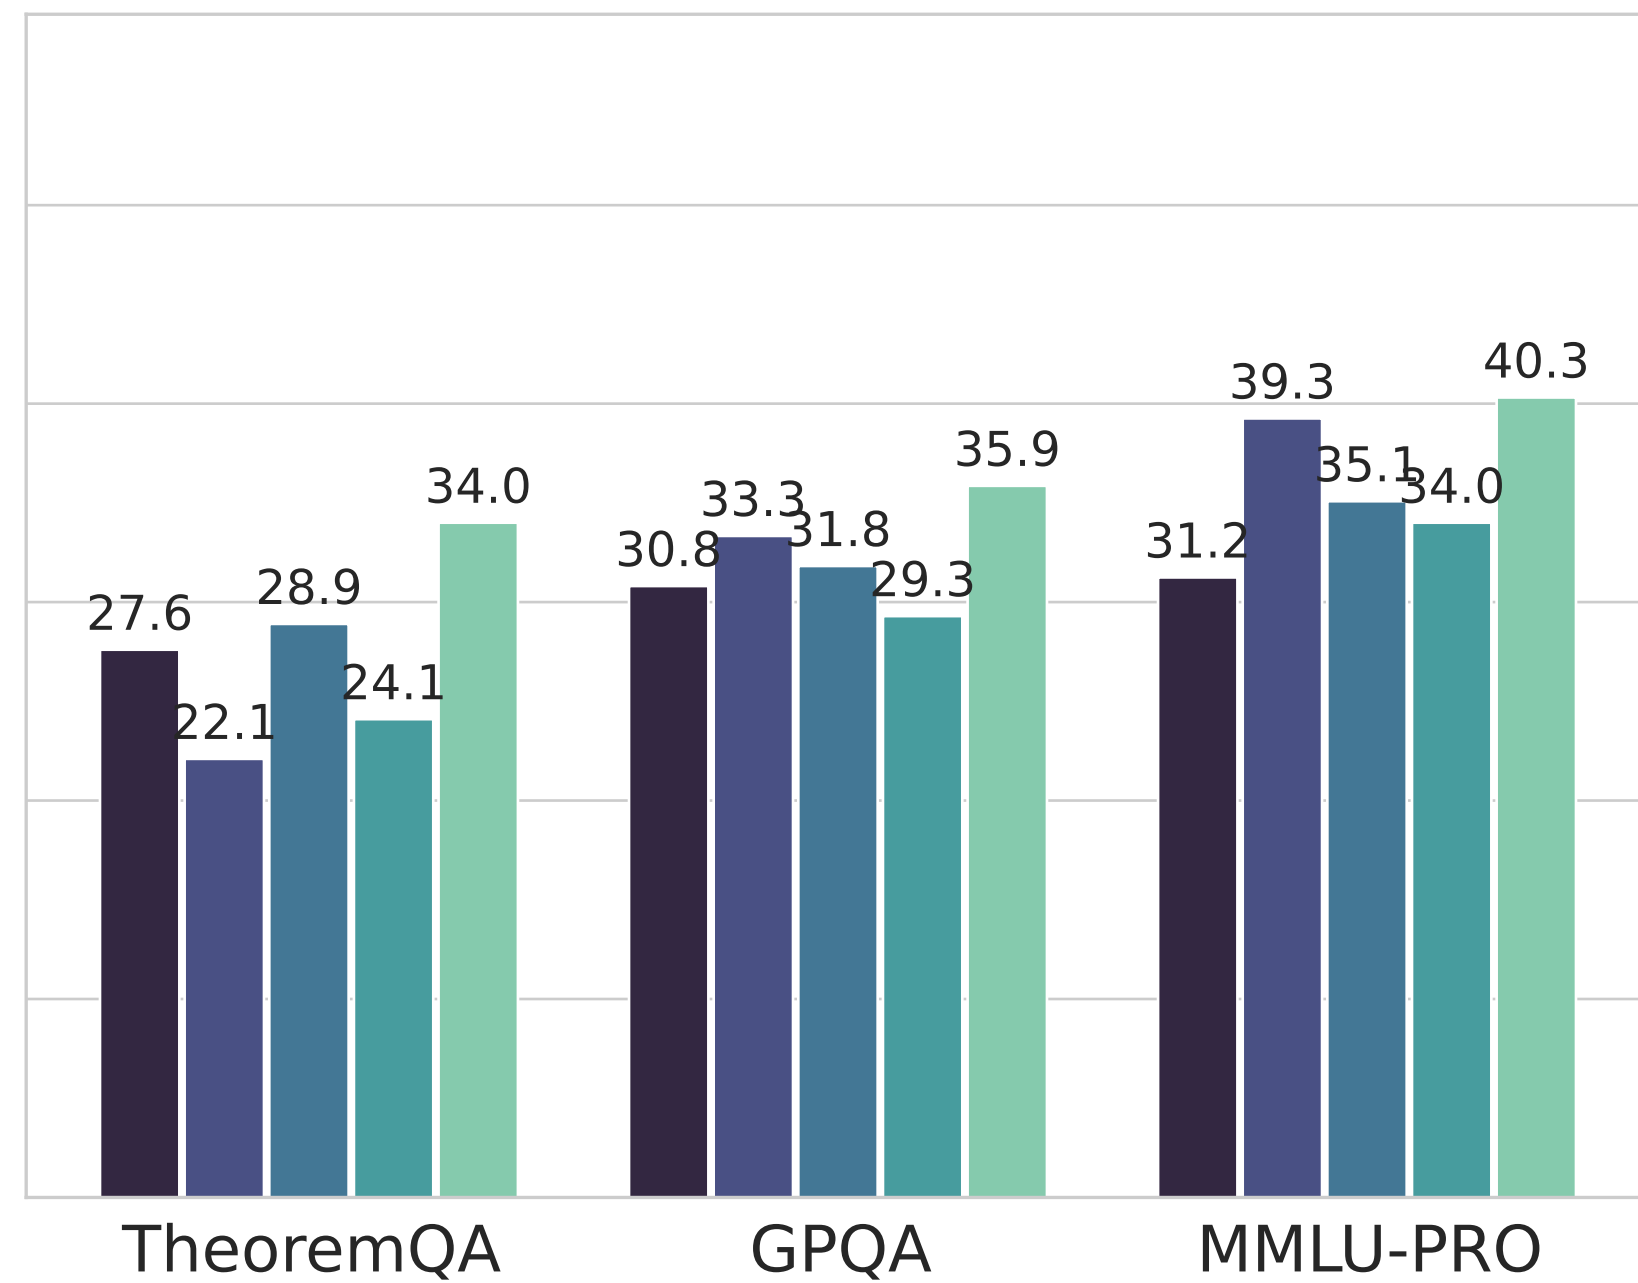

Supplement: supplementary_material [file accuracy_combined-checkpoint.pdf › CGD/res/.ipynb_checkpoints/accuracy_combined-checkpoint.pdf]
