# Supplementary material
Source: ML conference proceedings conference paper supplement (https://openreview.net/forum?id=2EvMmC23sC)

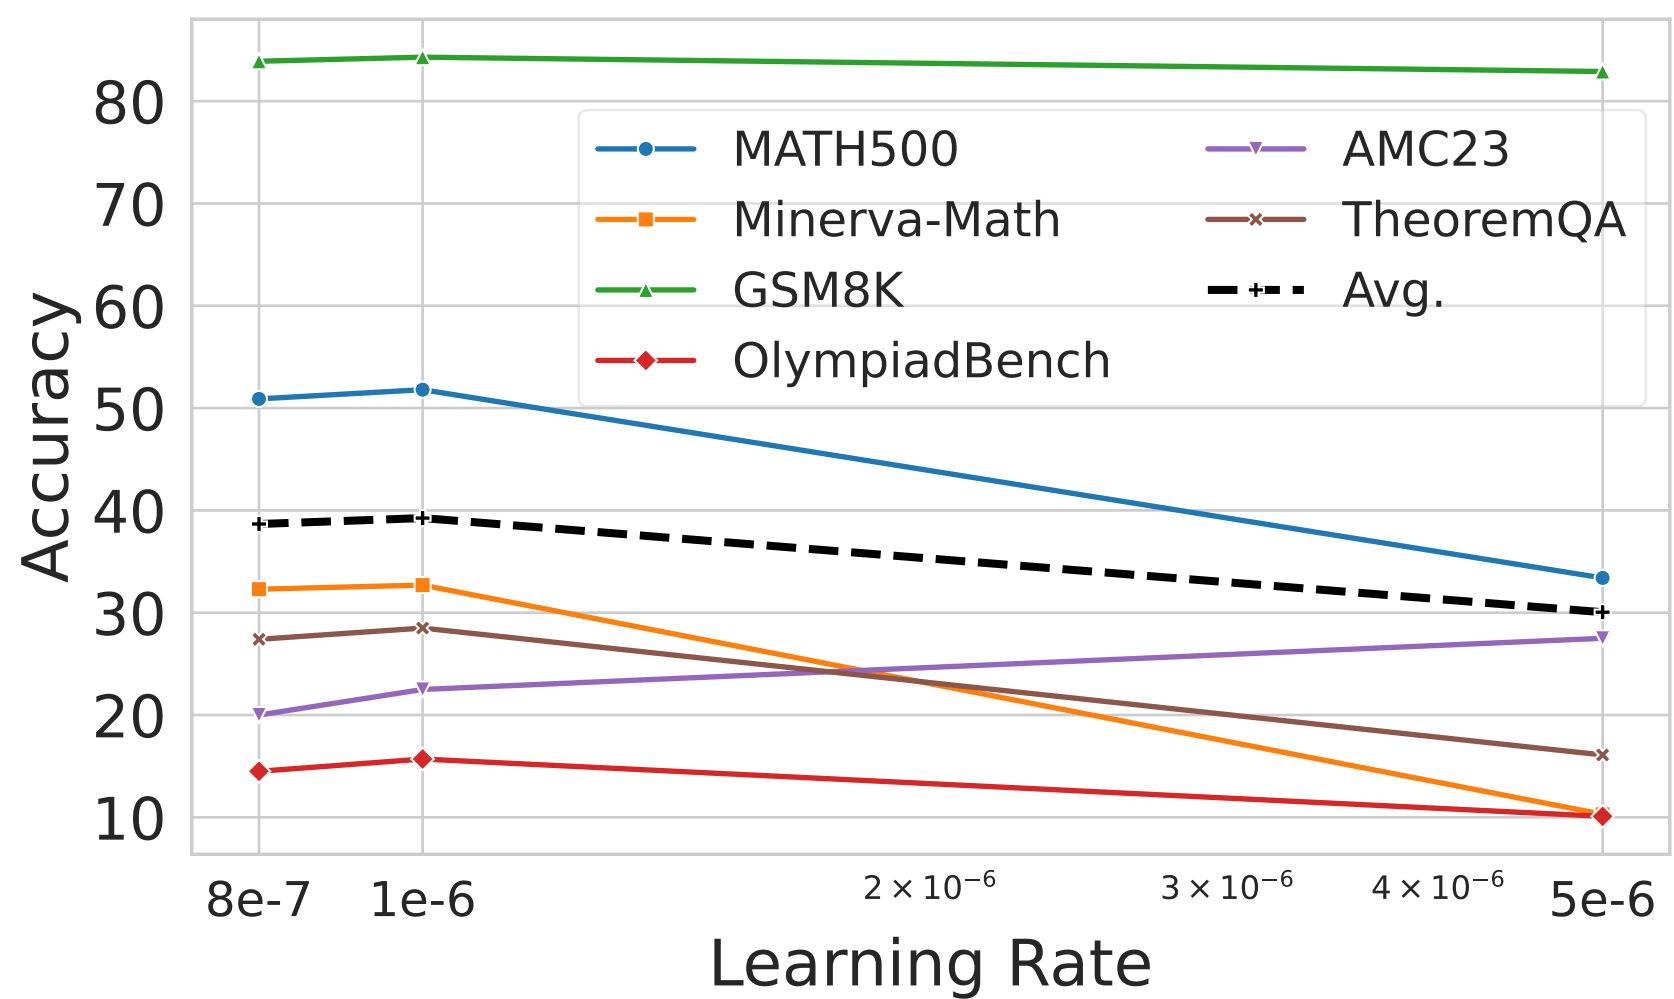

Supplement: supplementary_material [file lr_acc_cft-checkpoint.pdf › CGD/res/.ipynb_checkpoints/lr_acc_cft-checkpoint.pdf]
