# Supplementary material
Source: ML conference proceedings conference paper supplement (https://openreview.net/forum?id=2EvMmC23sC)

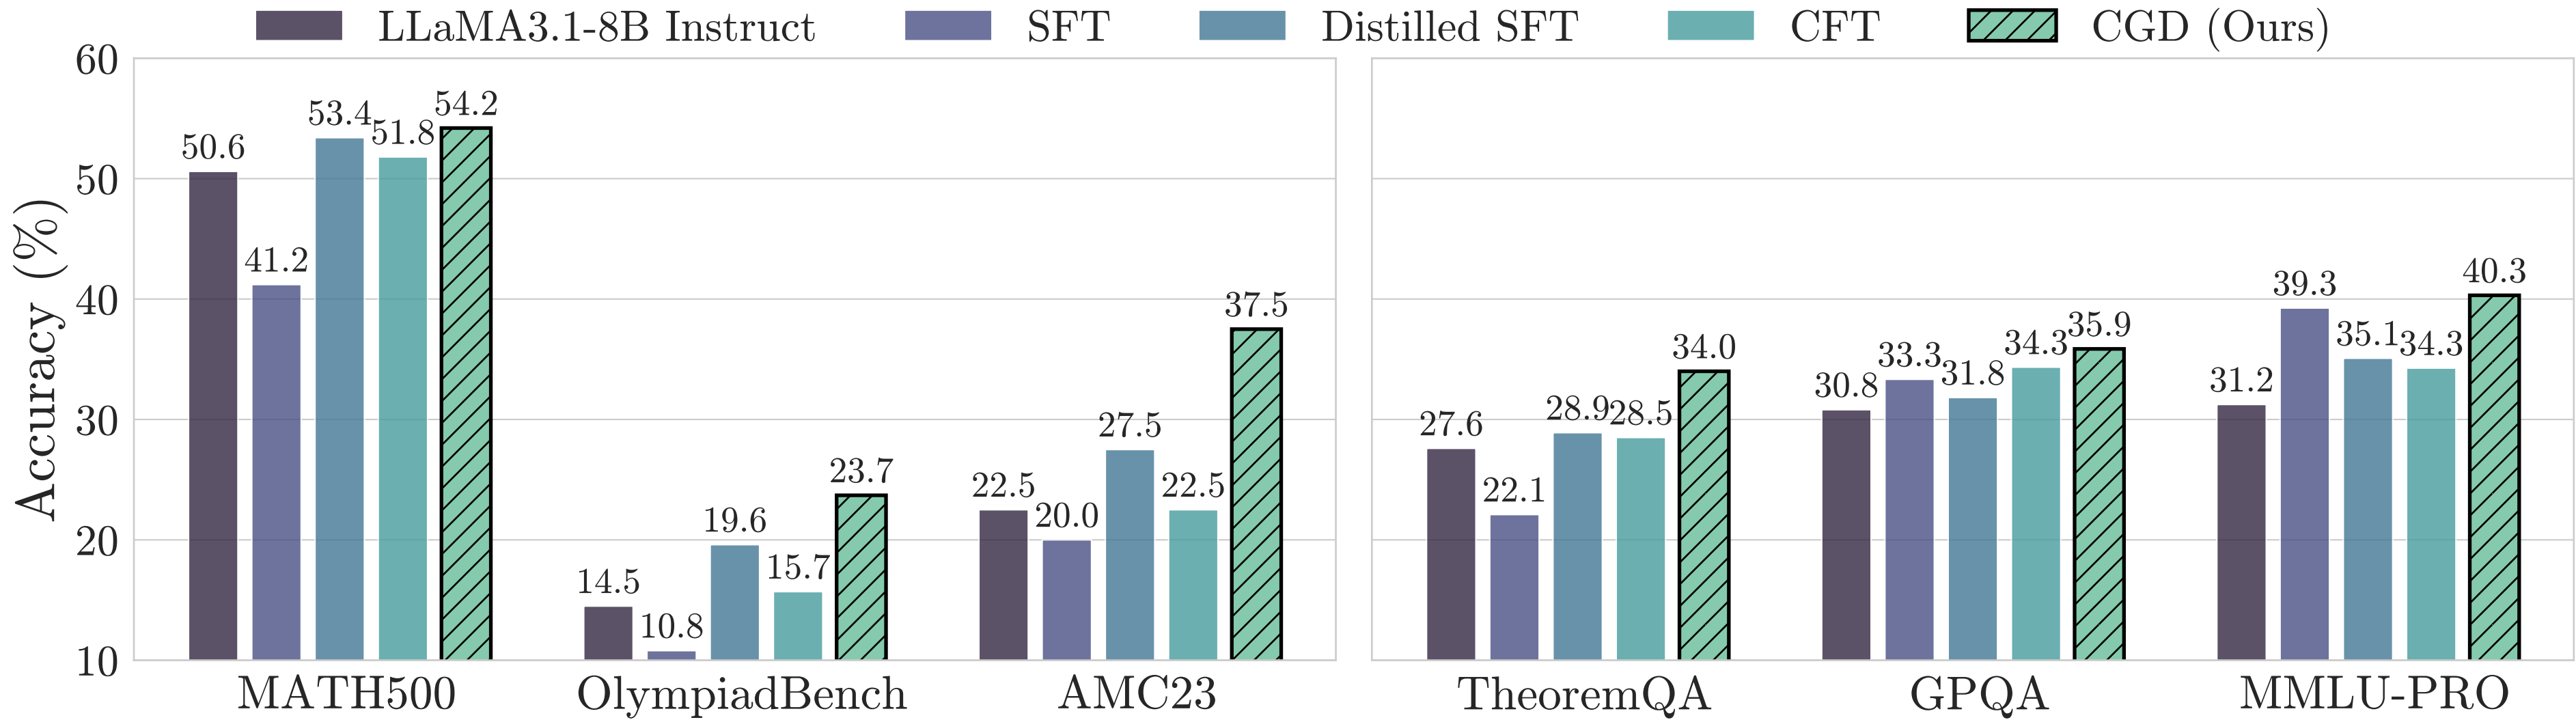

Supplement: supplementary_material [file accuracy_combined.pdf › CGD/res/accuracy_combined.pdf]

(a) LLaMA3.1-8B

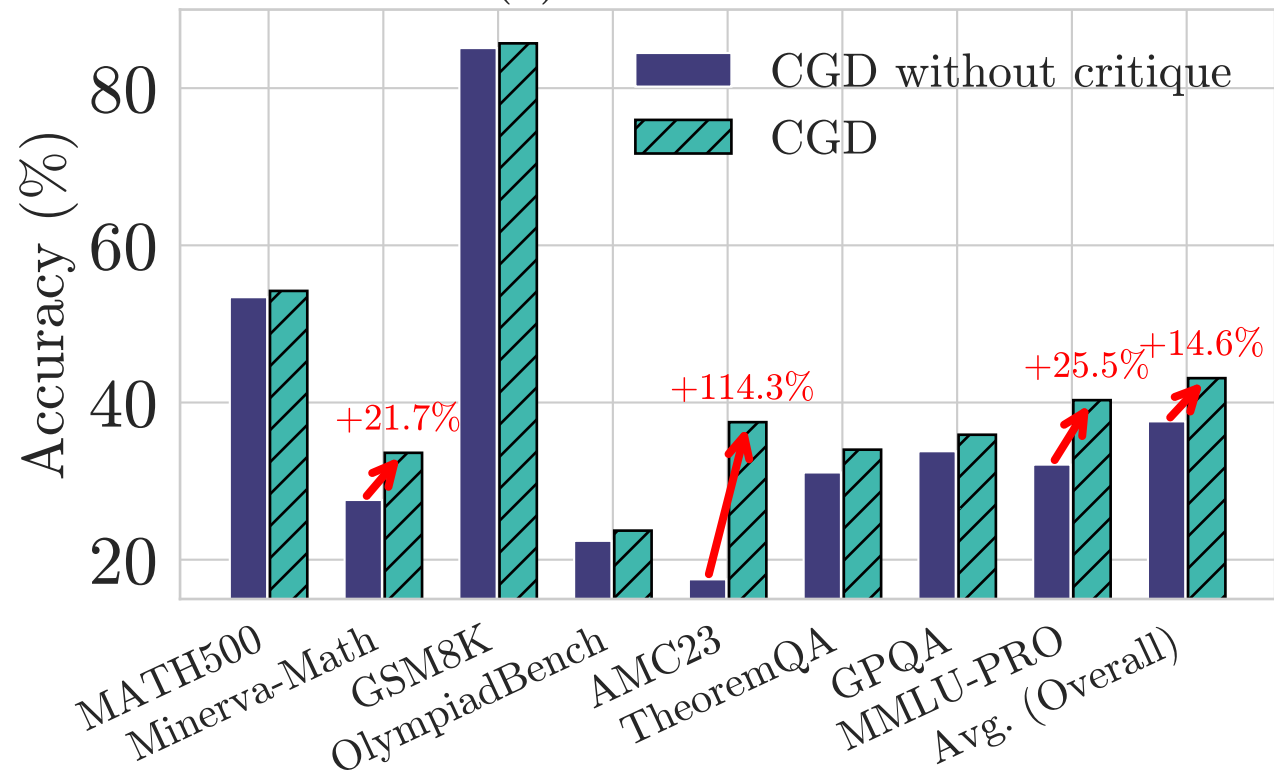

(b) S1.1-3B

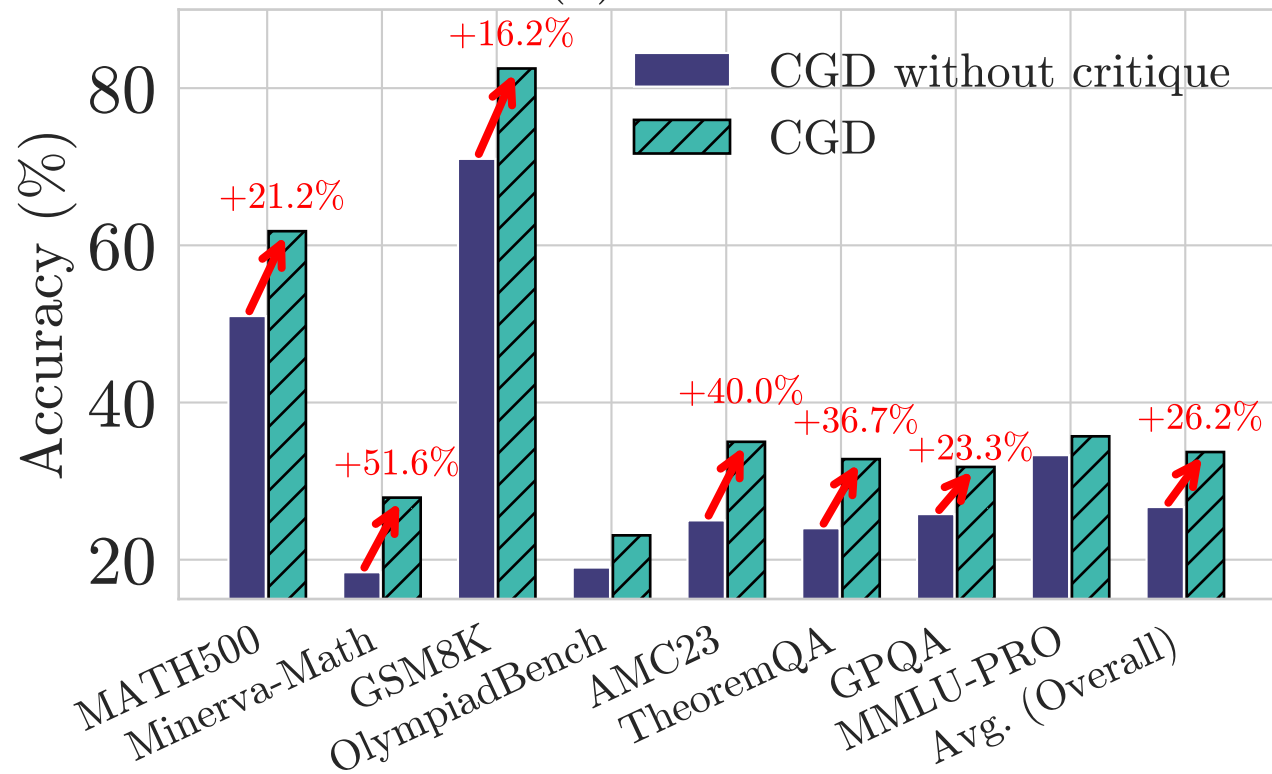

Supplement: supplementary_material [file cgd_entropy_combined.pdf › CGD/res/cgd_entropy_combined.pdf]

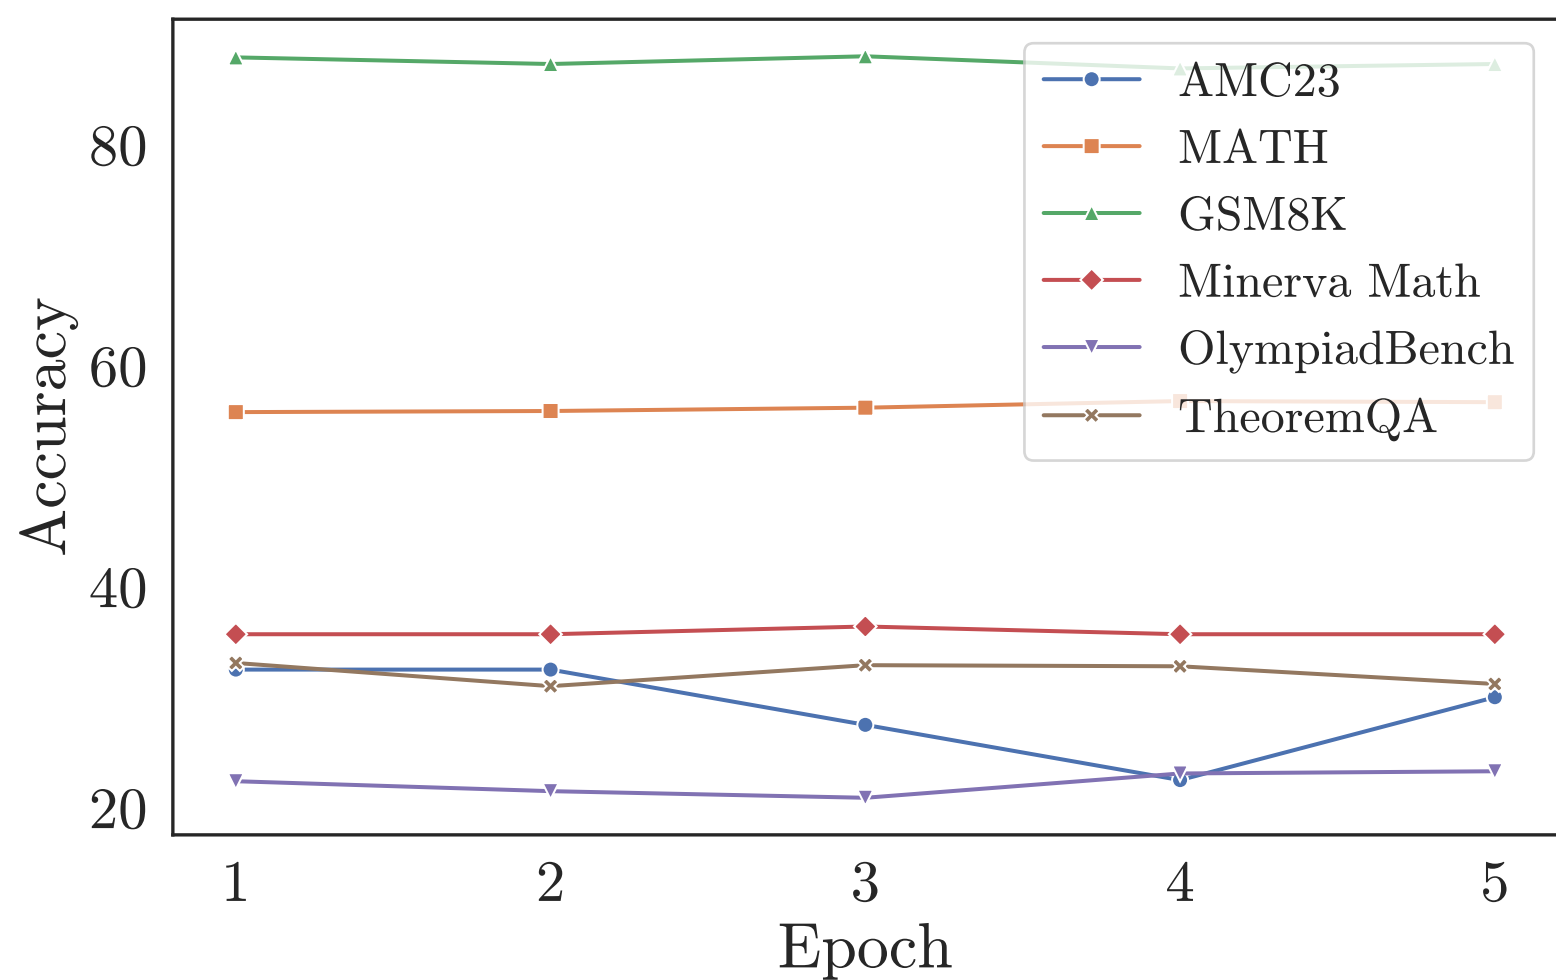

Supplement: supplementary_material [file epoch_acc.pdf › CGD/res/epoch_acc.pdf]

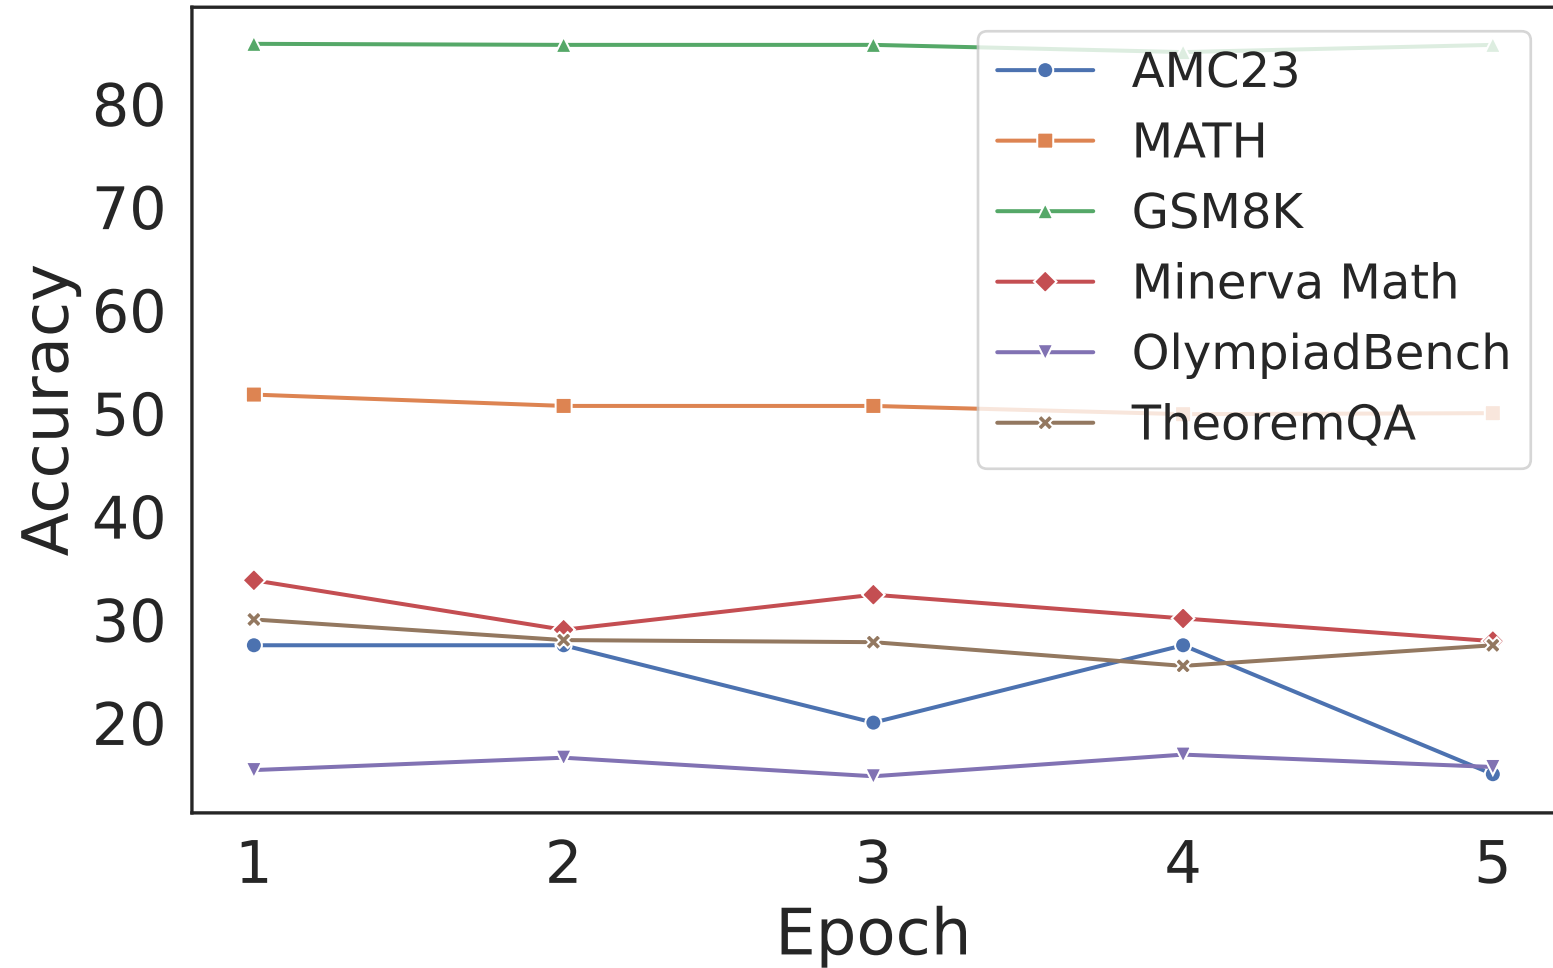

Supplement: supplementary_material [file epoch_acc_cft.pdf › CGD/res/epoch_acc_cft.pdf]

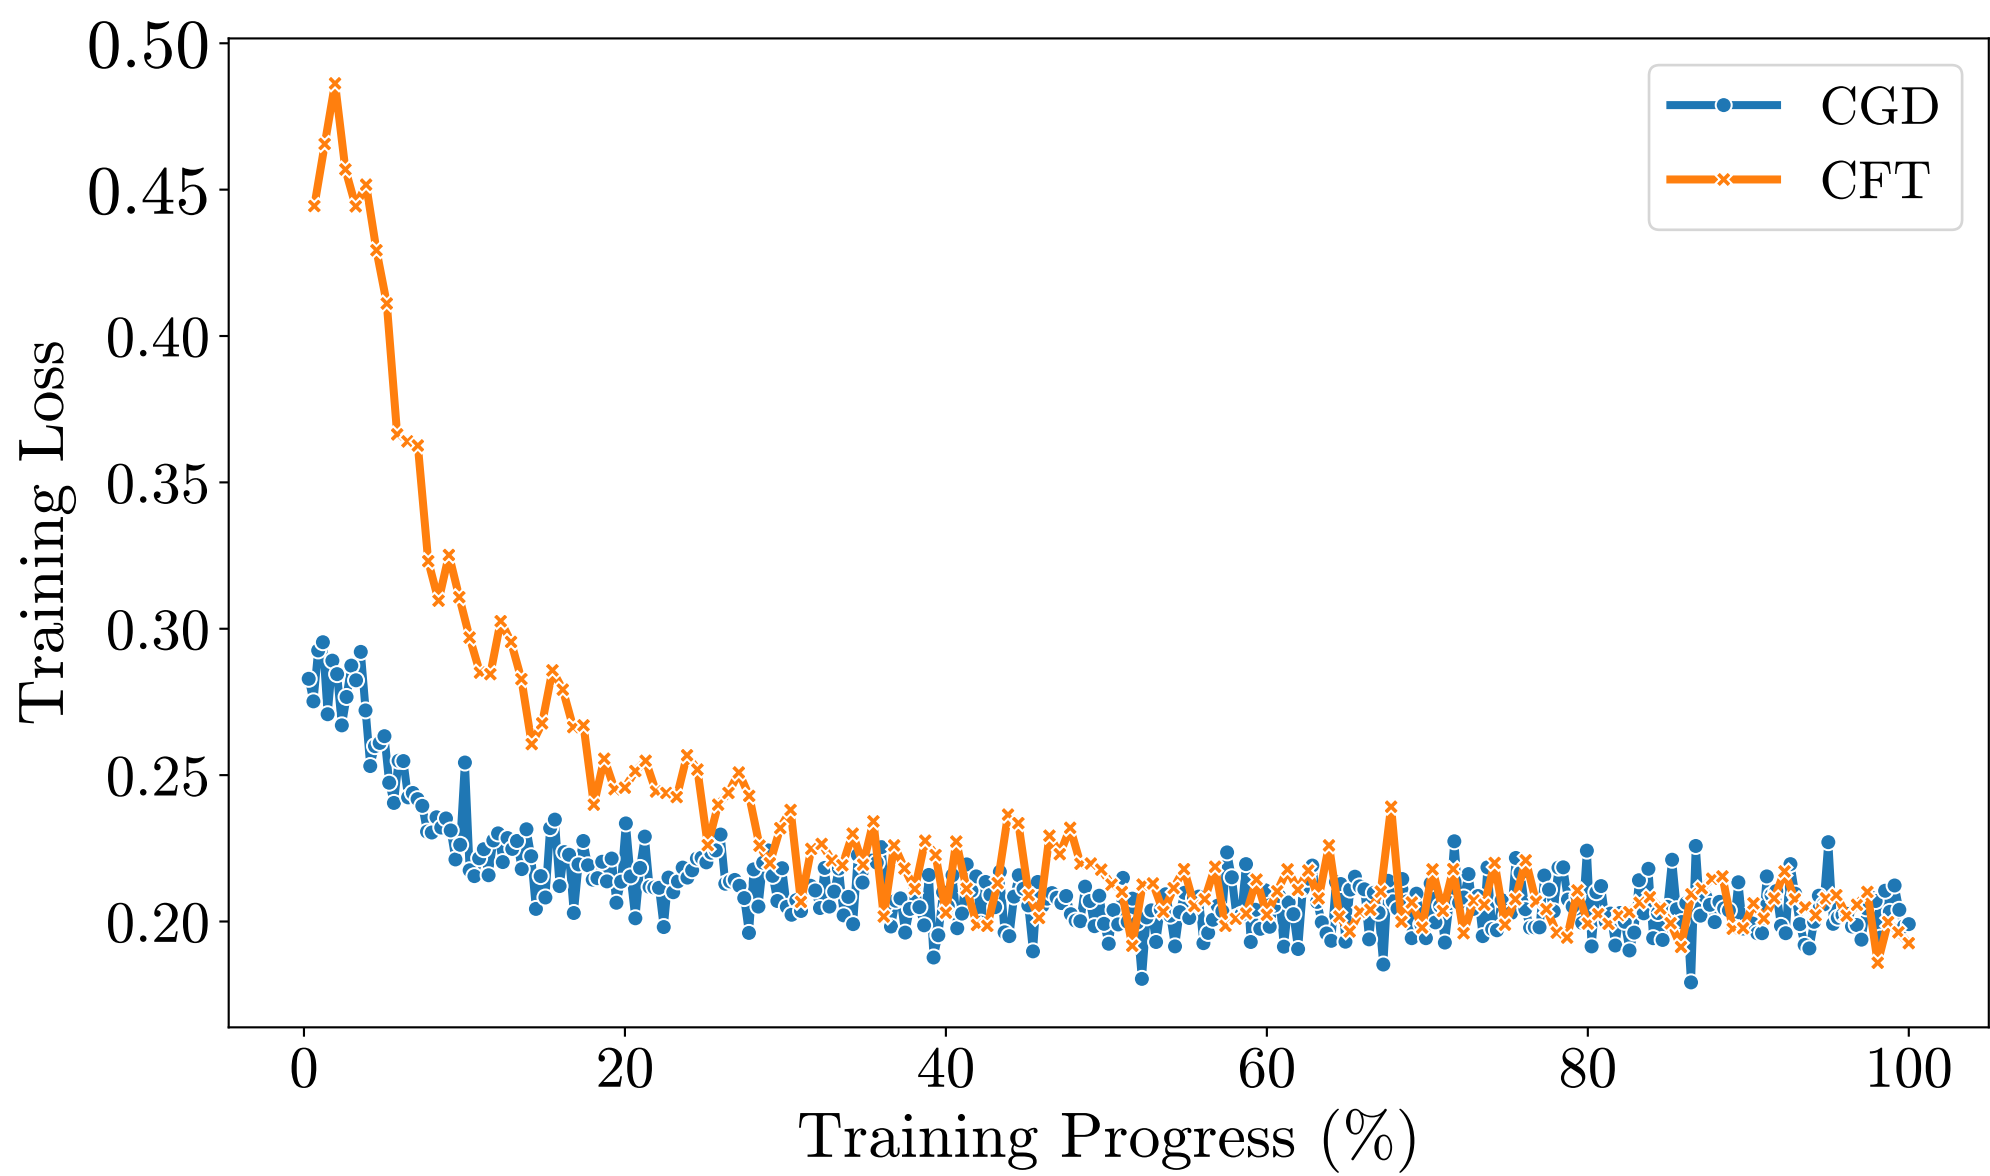

Supplement: supplementary_material [file loss_curve.pdf › CGD/res/loss_curve.pdf]

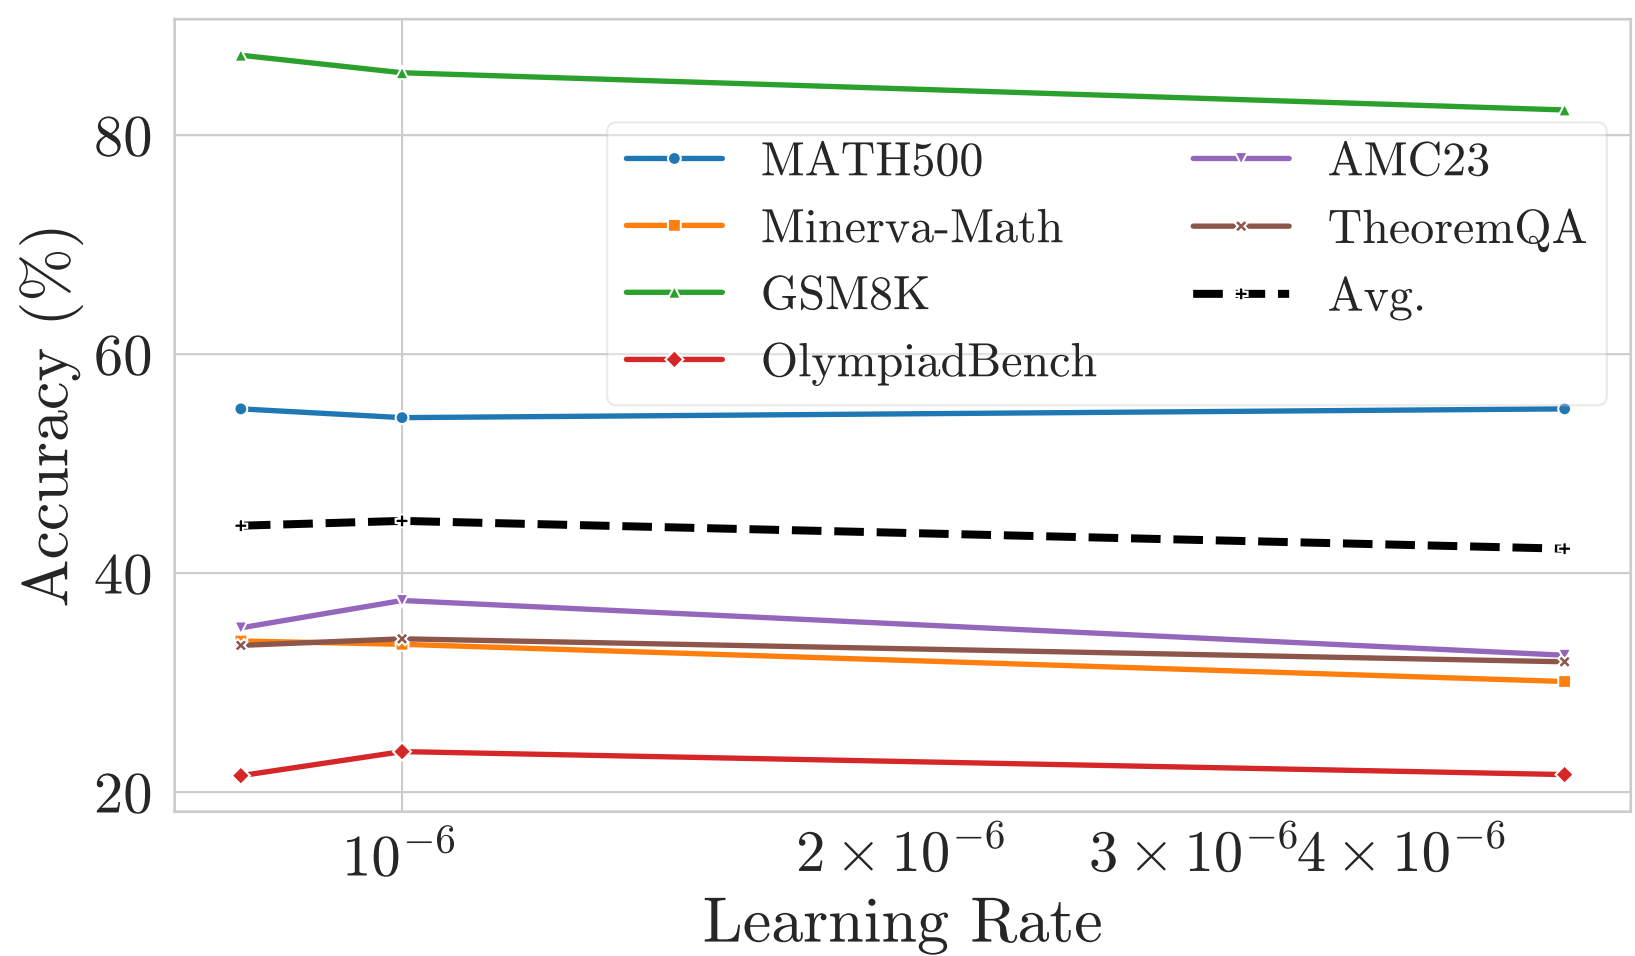

Supplement: supplementary_material [file lr_acc.pdf › CGD/res/lr_acc.pdf]

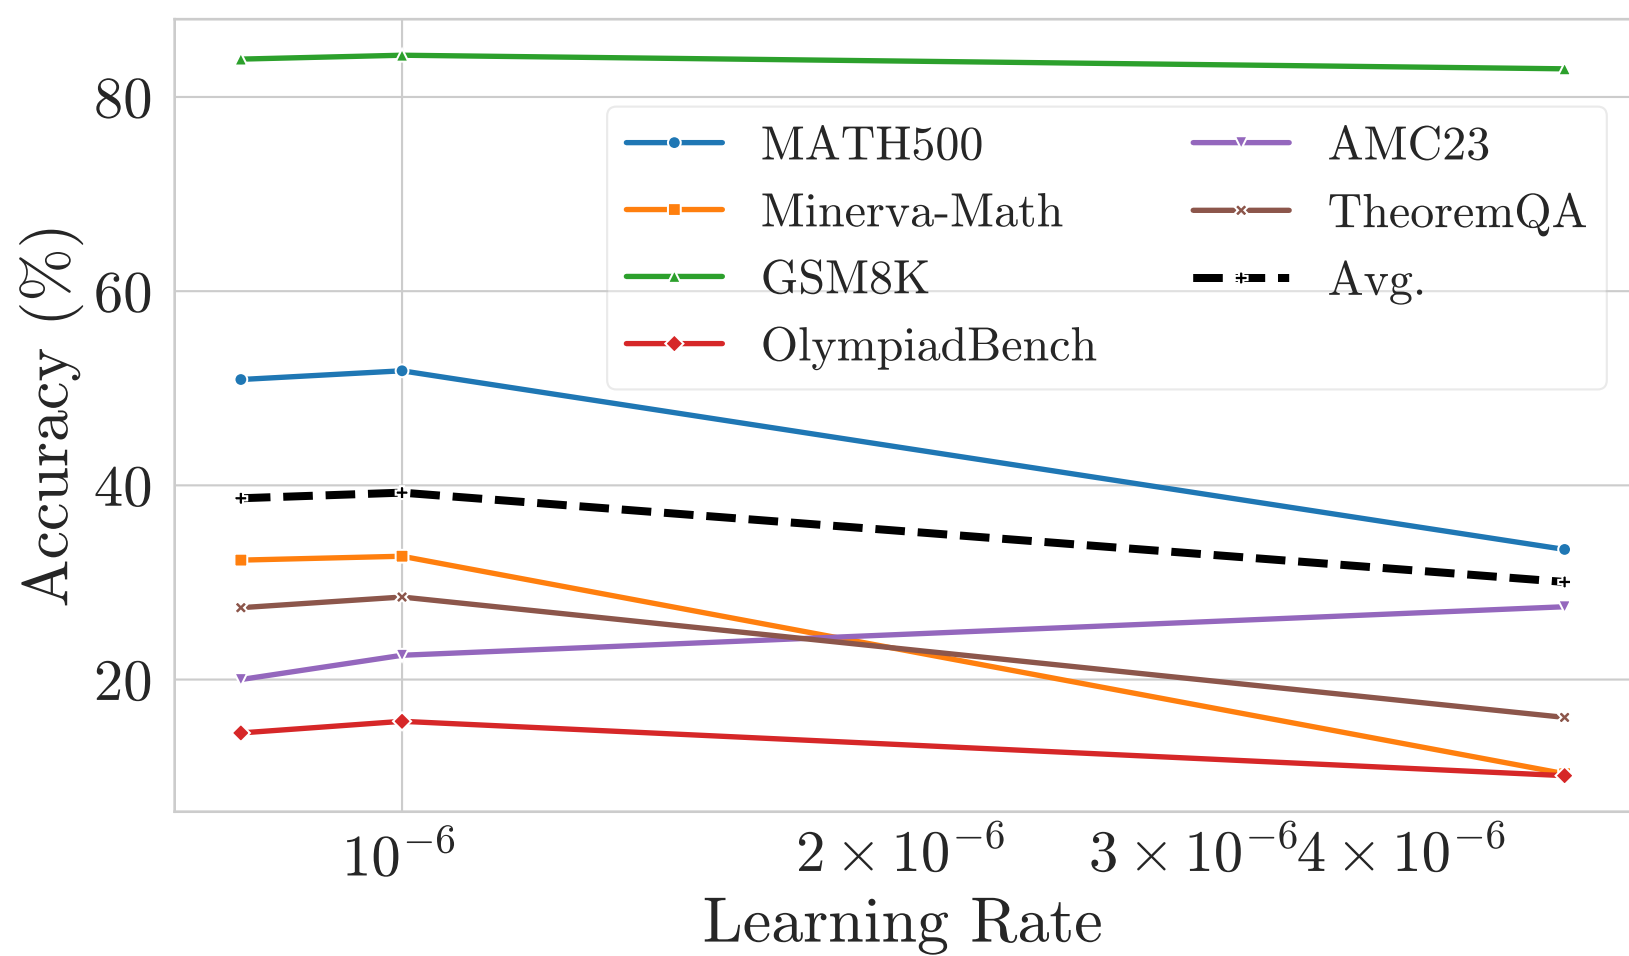

Supplement: supplementary_material [file lr_acc_cft.pdf › CGD/res/lr_acc_cft.pdf]
